# Supplementary material for: Chemical recycling to monomer: thermodynamic and kinetic control of the ring-closing depolymerization of aliphatic polyesters and polycarbonates
Source: Royal Society of Chemistry journal article supplement (doi:10.1039/d3py00535f), 2023-01-01
Supplement: d3py00535f1.pdf [file d3py00535f1.pdf]

## Supplementary Information

### Chemical recycling to monomer: thermodynamic and kinetic control of the ring-closing depolymerization of aliphatic polyesters and polycarbonates

Linnea Cederholm<sup>a</sup>, Peter Olsén<sup>a</sup>, Minna Hakkarainen<sup>a</sup>, Karin Odelius<sup>a\*</sup>

<sup>a</sup>Wallenberg Wood Science Center, WWSC, Department of Fibre and Polymer Technology, KTH Royal Institute of Technology, Teknikringen 56-58, 100 44 Stockholm, Sweden

\*Corresponding author: [hoem@kth.se](mailto:hoem@kth.se)

#### Table of Contents

|                                                                              |    |
|------------------------------------------------------------------------------|----|
| <b>Experimental</b> .....                                                    | S2 |
| Materials.....                                                               | S2 |
| Synthetic procedures.....                                                    | S2 |
| Characterization.....                                                        | S3 |
| <b>Polymerization thermodynamics</b> .....                                   | S4 |
| <b>Solubility parameters</b> .....                                           | S5 |
| <b>Relationship between solubility parameters and <math>T_c</math></b> ..... | S5 |
| <b>References</b> .....                                                      | S5 |

## Experimental

### Materials

All chemicals were used as received, unless otherwise is described. Trimethylene carbonate (TMC) was synthesised from diethyl carbonate (> 99%, anhydrous, Sigma-Aldrich) and 1,3-propane diol (99% Fisher Scientific), with sodium hydride (NaH, 60% dispersion in mineral oil, Sigma-Aldrich) as catalyst.  $\delta$ -Valerolactone ( $\delta$ VL, 99%, Apollo Scientific) was dried and distilled over calcium hydride ( $\text{CaH}_2$ , > 90%, Sigma-Aldrich) prior to use. L-lactide (LA, Beohringer-Ingelheim) was purified via recrystallization in toluene (Fischer Scientific, >99.8%) followed by drying under vacuum prior to use. Benzyl alcohol (BnOH, 99.8%, anhydrous, stored over 3 Å molecular sieves) was used as initiator for all ring-opening polymerization (ROP) reactions. The ROP and ring-closing depolymerization (RcDP) reactions were catalysed by either 1,5,7-triazabicyclo[4.4.0]dec-5-ene (TBD, 98% Sigma-Aldrich), tin(II) 2-ethylhexanoate ( $\text{SnOct}_2$ , > 92.5%, Sigma-Aldrich, stored over 3 Å molecular sieves) or diphenyl phosphate (DPP, Sigma-Aldrich, 99%). Reactions catalysed by TBD were quenched with acetic acid (100%, Merck), and reactions catalysed by DPP were quenched with triethylamine (Sigma-Aldrich, >99.5%). Toluene (PhMe, 99.8%, anhydrous, Sigma-Aldrich), 1,4-dioxane (DX, 99.8%, anhydrous, Sigma-Aldrich),  $\gamma$ -valerolactone (GVL, 99%, ReagentPlus, Sigma-Aldrich, stored over 3 Å molecular sieves), *N,N*-dimethylformamide (DMF, 99.8%, anhydrous, Sigma-Aldrich), propylene carbonate (PrC, 99.7%, anhydrous, Sigma-Aldrich), dimethyl sulfoxide (DMSO, VWR Chemicals, anhydrous), chlorobenzene (PhCl, Fluka Chemika, >98%, stored over 3 Å molecular sieves) and dichloromethane ( $\text{CH}_2\text{Cl}_2$ , > 99.8%, anhydrous, Sigma-Aldrich) were used as solvents for ROP and RcDP.

### Synthetic procedures

#### Monomer synthesis

The synthesis of TMC is described elsewhere.<sup>1</sup>

#### ROP and RcDP reactions

All preparations for ROP and RcDP were done inside a glove box ( $\text{N}_2$  atmosphere).

The polymerization thermodynamic parameters ( $\Delta H_p$  and  $\Delta S_p$ ) of  $\delta$ VL and TMC in the different solvents were determined through equilibrium ROP at three or four different temperatures per solvent. As a general procedure,  $\delta$ VL (0.10 g, 1.0 mmol, 1.0 equiv.), BnOH (20  $\mu\text{L}$  of 0.5 M stock solution in GVL, 0.01 mmol, 0.01 equiv.) and GVL (1.9 mL) were added to a head space vial. The vial was sealed with a septum crimp cap and was, thereafter, transferred out of the glove box. The ROP was carried out at 60 °C under stirring in a preheated sand bath, and the reaction was initiated by addition of TBD (0.1 mL of 0.2 M stock solution in GVL stored under  $\text{N}_2$  atmosphere, 0.02 mmol, 0.02 equiv.). The reaction was monitored by  $^1\text{H}$  NMR of aliquots withdrawn at regular time intervals quenched by addition of acetic acid (2.5 equiv. to TBD).

PTMC was synthesized by ROP of TMC. TMC (1.02 g, 10 mmol, 500 equiv.), BnOH (0.002 g, 0.02 mmol, 1 equiv.), TBD (0.003 g, 0.02 mmol, 1 equiv.) and  $\text{CH}_2\text{Cl}_2$  (5 mL) was added to a head space vial. The vial was sealed, and the reaction was carried out at room temperature (22 °C) under stirring. The reaction was quenched after 1 h by addition of acetic acid (2.5 equiv. to TBD). The polymer was precipitated in cold methanol and, thereafter, dried under vacuum at RT.

P $\delta$ VL was synthesized by ROP of  $\delta$ DL.  $\delta$ VL (1.00 g, 10 mmol, 500 equiv.), BnOH (0.002 g, 0.02 mmol, 1 equiv.) and  $\text{SnOct}_2$  (0.008 g, 0.02 mmol, 1 equiv.) were added to head space vial. The vial was sealed with a septum crimp cap before it was transferred out of the glove box. The reaction was carried out at 110 °C under

stirring in a preheated sand bath. The reaction was quenched by cooling after in total 6 h. The polymer was dissolved in chloroform, followed by precipitation in cold methanol. The polymer was dried under vacuum at RT.

PLA was synthesized by ROP of LA. LA (20.0 g, 139 mmol, 100 equiv.), BnOH (0.150 g, 1.39 mmol, 1 equiv.) and SnOct<sub>2</sub> (0.563 g, 1.39 mmol, 1 equiv.) was added to a round bottom flask. The flask was sealed with a glass stopper before it was transferred out of the glove box. The reaction was carried out at 100 °C under stirring in a preheated oil bath. The reaction was quenched by cooling after 1 h. The polymer was dissolved in chloroform, followed by precipitation in cold methanol. The polymer was dried under vacuum at RT.

The RCDP of PδVL, PTMC and PLA was carried out in GVL ( $[M]_{0,\delta VL} = [M]_{0,TMC} = [M]_{0,LA} = 0.5$  M) at 80-140 °C with either SnOct<sub>2</sub> or DPP as catalyst ([cat] = 0.05 M). As an example of a general procedure, PδVL (0.100 g, 1.00 mmol), PTMC (0.102 g, 1.00 mmol) and PLA (0.144 g, 1.00 mmol) were added to a space cap vial equipped with a magnetic stirrer. SnOct<sub>2</sub> (0.041 g, 0.10 mmol) and GVL (2 mL) were added and the vial was sealed. The vial was transferred out of the glove box, and the reaction was carried out at 140 °C in a preheated sand bath. The reaction was monitored by <sup>1</sup>H NMR of aliquots withdrawn at regular time intervals.

## ***Characterization***

### **Nuclear magnetic resonance (NMR)**

A Bruker Advance III HD (400 MHz) spectrometer was used for the recording of all <sup>1</sup>H NMR. The experiments were performed at RT with CDCl<sub>3</sub> as solvent. The signal from residual CHCl<sub>3</sub> (7.26 ppm) was used as internal reference.

### **Size exclusion chromatography (SEC)**

A Malvern GPCMAX instrument was used for molecular weight analysis. The instrument was equipped with a PLgel 5 µm guard column (7.5 x 50 mm) followed by two PLgel 5 µm MIXED-D (300 x 7.5 mm) columns. The analysis was performed at 35 °C in CHCl<sub>3</sub>, using narrow dispersity polystyrene standards with molecular weights ranging from 1.20 to 400 kg mol<sup>-1</sup>.

## Polymerization thermodynamics

**Table S1.** Data for determination of polymerization thermodynamic parameters of  $\delta$ VL. All polymerizations were performed at  $[M]_0 = 0.5$  M, with 2 mol% TBD as catalyst and monomer:initiator ratio  $[M]:[I] = 100:1$ .

| Solvent | Temperature<br>(°C) | Equilibrium conversion<br>(%) |
|---------|---------------------|-------------------------------|
| DMF     | 22                  | 35                            |
| DMF     | 30                  | 26                            |
| DMF     | 40                  | 15                            |
| GVL     | 22                  | 31                            |
| GVL     | 40                  | 21                            |
| GVL     | 60                  | 9                             |
| DMSO    | 22                  | 22                            |
| DMSO    | 30                  | 16                            |
| DMSO    | 40                  | 8                             |
| DX      | 22                  | 79                            |
| DX      | 40                  | 69                            |
| DX      | 70                  | 46                            |
| DX      | 80                  | 38                            |
| PhMe    | 40                  | 82                            |
| PhMe    | 60                  | 73                            |
| PhMe    | 70                  | 67                            |
| PhMe    | 80                  | 64                            |

**Table S2.** Data for determination of polymerization thermodynamic parameters of TMC. All polymerizations were performed at  $[M]_0 = 0.5$  M, with 2 mol% TBD as catalyst and monomer:initiator ratio  $[M]:[I] = 100:1$ .

| Solvent | Temperature<br>(°C) | Equilibrium conversion<br>(%) |
|---------|---------------------|-------------------------------|
| DMF     | 60                  | 69                            |
| DMF     | 70                  | 63                            |
| DMF     | 80                  | 61                            |
| DMF     | 90                  | 49                            |
| DMSO    | 60                  | 69                            |
| DMSO    | 70                  | 63                            |
| DMSO    | 80                  | 61                            |
| DMSO    | 90                  | 49                            |
| DX      | 60                  | 97                            |
| DX      | 70                  | 96                            |
| DX      | 80                  | 95                            |
| DX      | 90                  | 93                            |
| PhCl    | 70                  | 96                            |
| PhCl    | 90                  | 94                            |
| PhCl    | 110                 | 92                            |
| PhCl    | 130                 | 90                            |

## Solubility parameters

The Hildebrand solubility parameters of the solvents used in this study were calculated from the heat of vaporization  $\Delta H_{vap}$ ,<sup>2</sup>

$$\delta = \sqrt{\frac{\Delta H_{vap} - RT}{V_m}} \quad (\text{S1})$$

where  $R$  is the gas constant,  $T$  is the temperature and  $V_m$  denotes the molar volume. The used values for  $\Delta H_{vap}$  and the resulting  $\delta$  are presented in **Table S1**.

**Table S3.** Heat of vaporization ( $\Delta H_{vap}$ ) and Hildebrand solubility parameters ( $\delta$ ) of solvents.

|                                          | DMF  | GVL  | PrC  | DMSO | DX   | PhMe | PhCl  | THF  |
|------------------------------------------|------|------|------|------|------|------|-------|------|
| $\Delta H_{vap}$ (kJ*mol <sup>-1</sup> ) | 46.9 | 54.8 | 55.2 | 52.9 | 38.6 | 38.0 | 41.20 | 32.5 |
| $\delta$ (MPa <sup>1/2</sup> )           | 24.0 | 23.4 | 24.8 | 26.6 | 20.5 | 18.2 | 19.5  | 19.2 |

## Relationship between solubility parameters and $T_c$

A relationship between the Hildebrand solubility parameters of monomer, solvent and polymer was derived in our previous study (see Supporting Information to reference):<sup>3</sup>

$$T_c = A(\delta_m - \delta_s)^2 + B(\delta_s - \delta_p)^2 + C \quad (\text{S2})$$

The expression can be expanded and rearranged accordingly:

$$T_c = A\delta_m^2 + A\delta_s^2 - 2A\delta_m\delta_s + B\delta_s^2 + B\delta_p^2 - 2B\delta_s\delta_p + C \quad (\text{S3})$$

$$T_c = (A + B)\delta_s^2 + (-2A\delta_m - 2B\delta_p)\delta_s + A\delta_m^2 + B\delta_p^2 + C \quad (\text{S4})$$

Considering one specific monomer-polymer system, both  $\delta_m$  and  $\delta_p$  will be constant. (S4) can therefore be rewritten accordingly (where  $a = A + B$ ;  $b = -2A\delta_m - 2B\delta_p$ ;  $c = A\delta_m^2 + B\delta_p^2 + C$ ):

$$T_c = a\delta_s^2 + b\delta_s + c \quad (\text{S5})$$

## References

1. Hua, G., Olsén, P., Franzén, J. & Odelius, K. Anionic polycondensation and equilibrium driven monomer formation of cyclic aliphatic carbonates. *RSC Adv.* DOI:10.1039/c8ra08219g (2018) doi:10.1039/c8ra08219g.
2. Acree Jr, W. & Chickos, J. S. Phase transition enthalpy measurements of organic and organometallic compounds. Sublimation, vaporization and fusion enthalpies from 1880 to 2015. Part 1. C1– C10. *J. Phys. Chem. Ref. Data* **45**, 33101 (2016).
3. L. Cederholm, J. Wohler, P. Olsén, M. Hakkarainen, K. Odelius, *Angew. Chem., Int. Ed.*, 2022, **61**, e202204531.
